# Supplementary material
Source: MDPI journal article supplement (https://www.mdpi.com/2079-4983/14/2/111)
Supplement: s1 [file s1]

Archive with 2 entries (2 files):
- open source data of the Figures.xlsx
- Supplementary Material.pdf
