# Supplementary material for: Effectiveness of BMP-2 and PDGF-BB Adsorption onto a Collagen/Collagen-Magnesium-Hydroxyapatite Scaffold in Weight-Bearing and Non-Weight-Bearing Osteochondral Defect Bone Repair: In Vitro, Ex Vivo and In Vivo Evaluation
Source: MDPI journal article supplement (doi:10.3390/jfb14020111), 2023-02-16
Supplement: s1 [file s1 › open source data of the Figures.xlsx]

## Sheet: growth factors release in vitro
BMP-2																								SAMPLES		4PL(log)curve-fit	pg/mL uncorrected	pg/ml corrected	corrected ng/ml
plate 2	1	2	3	4	5	6	7	8	9	10	11	12											1	C.S1 6h	0.0229	1.91334	81.91	1638.2	1.6382
A	0	46.88	93.75	187.5	375	750	1500	3000	left-over Contr.	Contr. S1 24h	Contr. S2 24h	Contr. S3 24h											2	C.S2 6h	0.0876	2.48127	302.88	6057.61	6.05761
B	0	46.88	93.75	187.5	375	750	1500	3000		Contr. S1 48h	Contr. S2 48h	Contr. S3 48h											3	C.S3 6h	0.1563	2.73451	542.643	10852.9	10.8529
C	C.S1 6h	C.S2 6h	C.S3 6h	B.S1 6h	B.S2 6h	B.S3 6h	C.S1 24h	C.S2 24h	C.S3 24h	B.S1 24h	B.S2 24h	B.S3 24h											4	B.S1 6h	0.0652	2.35467	226.292	4525.84	4.52584
D	C.S1 48h	C.S2 48h	C.S3 48h	B.S1 48h	B.S2 48h	B.S3 48h	C.S1 3d	C.S2 3d	C.S3 3d	B.S1 3d	B.S2 3d	B.S3 3d											5	B.S2 6h	0.0787	2.43519	272.388	5447.76	5.44776
E	C.S1 4d	C.S2 4d	C.S3 4d	B.S1 4d	B.S2 4d	B.S3 4d	C.S1 5d	C.S2 5d	C.S3 5d	B.S1 5d	B.S2 5d	B.S3 5d		20x diluted									6	B.S3 6h	0.0492	2.23502	171.797	3435.94	3.43594
F	C.S1 6d	C.S2 6d	C.S3 6d	B.S1 6d	B.S2 6d	B.S3 6d	C.S1 7d	C.S2 7d	C.S3 7d	B.S1 7d	B.S2 7d	B.S3 7d		10x diluted									7	C.S1 24h	0.2541	2.9557	903.028	9030.28	9.03028
G	C.S1 14d	C.S2 14d	C.S3 14d	B.S1 14d	B.S2 14d	B.S3 14d	Contr. S1 14d	Contr. S2 14d	Contr. S3 14d	left over C. S1	left over C. S2	left over C. S3		5x diluted									8	C.S2 24h	0.3095	3.04911	1119.73	11197.3	11.1973
H	C. S1 14d agit.	C. S2 14d agit.	C. S3 14d agit.	B. S1 14d agit.	B. S2 14d agit.	B. S3 14d agit.	left over B. S1	left over B. S2	left over B. S3	Contr. S1 6h	Contr. S2 6h	Contr. S3 6h											9	C.S3 24h	0.2286	2.90661	806.518	8065.18	8.06518
																							10	B.S1 24h	0.1108	2.58307	382.885	3828.85	3.82885
																							11	B.S2 24h	0.1093	2.57713	377.686	3776.86	3.77686
plate 2 readout:																							12	B.S3 24h	0.1072	2.56869	370.415	3704.15	3.70415
Absorbance @ 405 (0.1s) (A)																							13	C.S1 48h	0.22	2.88896	774.398	3871.99	3.87199
																							14	C.S2 48h	0.5437	3.33608	2168.08	10840.4	10.8404
	0.1626	0.1794	0.2	0.2382	0.3248	0.4919	0.7572	1.1983	2.6002	0.3179	0.4295	0.3035											15	C.S3 48h	0.3393	3.09363	1240.61	6203.03	6.20303
	0.1761	0.2147	0.2282	0.2727	0.3408	0.5236	0.8498	1.2656		0.6924	0.6386	0.6274											16	B.S1 48h	0.0895	2.49052	309.403	1547.01	1.54701
	0.2145	0.3326	0.47	0.2773	0.301	0.2444	0.5873	0.6754	0.5287	0.3358	0.3442	0.3291											17	B.S2 48h	0.2661	2.97732	949.126	4745.63	4.74563
	0.5997	1.0912	0.7581	0.3207	0.5412	0.3256	0.5615	0.6802	0.5293	0.3152	0.3246	0.2654											18	B.S3 48h	0.1	2.5385	345.538	1727.69	1.72769
	0.6011	0.7867	0.6251	0.4057	0.3754	0.3417	0.6298	0.7831	0.5784	0.3573	0.3735	0.3043											19	C.S1 3d	0.2506	2.94923	889.666	4448.33	4.44833
	0.414	0.5583	0.551	0.3566	0.3394	0.3342	0.509	0.616	0.4796	0.3108	0.3129	0.2789											20	C.S2 3d	0.3437	3.09993	1258.73	6293.63	6.29363
	0.424	1.0199	0.4299	0.3826	0.3225	0.3427	0.9828	0.7117	0.4299	0.2348	0.2225	0.4175											21	C.S3 3d	0.2479	2.94418	879.383	4396.91	4.39691
	0.38	0.5878	0.3571	0.3035	0.3895	0.2778	0.2752	1.5643	0.2737	0.8957	0.6198	1.6533											22	B.S1 3d	0.1015	2.54495	350.714	1753.57	1.75357
																							23	B.S2 3d	0.1046	2.55801	361.422	1807.11	1.80711
																							24	B.S3 3d	0.0682	2.37387	236.522	1182.61	1.18261
plate 2 readout:																							25	C.S1 4d	0.2118	2.87155	743.966	3719.83	3.71983
Abs@650 (0.1s) (A)																							26	C.S2 4d	0.3246	3.0721	1180.58	5902.92	5.90292
																							27	C.S3 4d	0.2486	2.94549	882.048	4410.24	4.41024
	0.0919	0.0985	0.1082	0.1225	0.1587	0.2192	0.3228	0.4599	0.996	0.1445	0.1941	0.1396											28	B.S1 4d	0.1393	2.68346	482.454	2412.27	2.41227
	0.0948	0.1048	0.1123	0.1269	0.1483	0.2155	0.329	0.4611		0.2638	0.2848	0.2572											29	B.S2 4d	0.1195	2.61607	413.115	2065.58	2.06558
	0.1156	0.169	0.2377	0.1361	0.1463	0.1192	0.2572	0.2899	0.2241	0.149	0.1589	0.1459											30	B.S3 4d	0.1106	2.58228	382.191	1910.96	1.91096
	0.3037	0.4715	0.3428	0.1552	0.1991	0.1496	0.2349	0.2605	0.2054	0.1377	0.144	0.1212											31	C.S1 5d	0.3075	3.046	1111.73	5558.65	5.55865
	0.3133	0.3861	0.3005	0.1904	0.1799	0.1551	0.2463	0.313	0.2298	0.1596	0.1679	0.1359											32	C.S2 5d	0.3941	3.16777	1471.53	7357.63	7.35763
	0.2182	0.2622	0.2516	0.1657	0.1545	0.1468	0.2096	0.2409	0.1925	0.1351	0.1374	0.1285											33	C.S3 5d	0.2726	2.98869	974.287	4871.44	4.87144
	0.2128	0.5074	0.2112	0.1845	0.1426	0.1491	0.3989	0.2783	0.1797	0.1088	0.1051	0.18											34	B.S1 5d	0.1217	2.62406	420.782	2103.91	2.10391
	0.2081	0.2909	0.1889	0.1512	0.1934	0.1384	0.1335	0.6353	0.1253	0.3738	0.2651	0.633											35	B.S2 5d	0.1296	2.65165	448.388	2241.94	2.24194
																							36	B.S3 5d	0.0924	2.50429	319.367	1596.83	1.59683
																							37	C.S1 6d	0.1198	2.61717	414.161	2070.8	2.0708
																							38	C.S2 6d	0.2201	2.88917	774.769	3873.84	3.87384
ABS 405-650 nm																							39	C.S3 6d	0.2234	2.89601	787.071	3935.36	3.93536
	1	2	3	4	5	6	7	8	9	10	11	12											40	B.S1 6d	0.1149	2.59892	397.115	1985.57	1.98557
																							41	B.S2 6d	0.1089	2.57553	376.301	1881.5	1.8815
	0.0707	0.0809	0.0918	0.1157	0.1661	0.2727	0.4344	0.7384	1.6042	0.1734	0.2354	0.1639											42	B.S3 6d	0.1114	2.58542	384.966	1924.83	1.92483
	0.0813	0.1099	0.1159	0.1458	0.1925	0.3081	0.5208	0.8045		0.4286	0.3538	0.3702											43	C.S1 7d	0.2234	2.89601	787.071	3935.36	3.93536
	0.0989	0.1636	0.2323	0.1412	0.1547	0.1252	0.3301	0.3855	0.3046	0.1868	0.1853	0.1832											44	C.S2 7d	0.2991	3.03273	1078.28	5391.38	5.39138
	0.296	0.6197	0.4153	0.1655	0.3421	0.176	0.3266	0.4197	0.3239	0.1775	0.1806	0.1442											45	C.S3 7d	0.2111	2.87004	741.377	3706.88	3.70688
	0.2878	0.4006	0.3246	0.2153	0.1955	0.1866	0.3835	0.4701	0.3486	0.1977	0.2056	0.1684											46	B.S1 7d	0.0997	2.53719	344.504	1722.52	1.72252
	0.1958	0.2961	0.2994	0.1909	0.1849	0.1874	0.2994	0.3751	0.2871	0.1757	0.1755	0.1504											47	B.S2 7d	0.0995	2.53632	343.814	1719.07	1.71907
	0.2112	0.5125	0.2187	0.1981	0.1799	0.1936	0.5839	0.4334	0.2502	0.126	0.1174	0.2375											48	B.S3 7d	0.0744	2.41109	257.688	1288.44	1.28844
	0.1719	0.2969	0.1682	0.1523	0.1961	0.1394	0.1417	0.929	0.1484	0.5219	0.3547	1.0203											49	C.S1 14d	0.1352	2.67028	468.031	2340.16	2.34016
																							50	C.S2 14d	0.4365	3.21972	1658.52	8292.61	8.29261
		standard																					51	C.S3 14d	0.1427	2.69412	494.442	2472.21	2.47221
																							52	B.S1 14d	0.1221	2.62549	422.176	2110.88	2.11088
																							53	B.S2 14d	0.1039	2.5551	359.002	1795.01	1.79501
																							54	B.S3 14d	0.1176	2.60906	406.501	2032.51	2.03251
	st.curve 1	st.curve 2	Average	Average -Blank	conc. pg/ml																		55	Contr. S1 14d	0.5079	3.29921	1991.63	9958.16	9.95816
	0.0707	0.0813	0.076	0	0																		56	Contr. S2 14d	0.3574	3.11912	1315.6	6578	6.578
	0.0809	0.1099	0.0954	0.0194	46.8																		57	Contr. S3 14d	0.1742	2.783	606.731	3033.65	3.03365
	0.0918	0.1159	0.10385	0.02785	93.5																		58	left over C. S1	0.05	2.24185	174.521	3490.42	3.49042
	0.1157	0.1458	0.13075	0.05475	187																		59	left over C. S2	0.0414	2.16205	145.229	2904.58	2.90458
	0.1661	0.1925	0.1793	0.1033	375																		60	left over C. S3	0.1615	2.7491	561.182	11223.6	11.2236
	0.2727	0.3081	0.2904	0.2144	750																		61	C. S1 14d agit.	0.0959	2.52036	331.409	1657.04	1.65704
	0.4344	0.5208	0.4776	0.4016	1500																		62	C. S2 14d agit.	0.2209	2.89084	777.748	3888.74	3.88874
	0.7384	0.8045	0.77145	0.69545	3000																		63	C. S3 14d agit.	0.0922	2.50335	318.679	1593.4	1.5934
																							64	B. S1 14d agit.	0.0763	2.4219	264.181	1320.9	1.3209
																							65	B. S2 14d agit.	0.1201	2.61826	415.205	2076.03	2.07603
	a	1786.1																					66	B. S3 14d agit.	0.0634	2.34273	220.156	1100.78	1.10078
	b	3051.8																					67	left over B. S1	0.0657	2.35793	227.996	4559.93	4.55993
	c	7.8705																					68	left over B. S2	0.853	3.60605	4036.94	80738.7	80.7387
				y=ax^2+bx+cx																			69	left over B. S3	0.0724	2.39942	250.856	5017.13	5.01713
				geldt niet voor met ^3 vergelijking																			70	Contr. S1 6h	0.4459	3.23071	1701.03	34020.5	34.0205
																							71	Contr. S2 6h	0.2787	2.99914	998.019	19960.4	19.9604
																							72	Contr. S3 6h	0.9443	3.6764	4746.77	94935.4	94.9354
														final calculated concentration									73	left-over Contr.	1.5282	4.12424	13312	266240	266.24
Asample -blanco Plate 2														BMP-2 (ng)									74	Contr. S1 24h	0.0974	2.52708	336.575	3365.75	3.36575
-0.0053	0.0049	0.0158	0.0397	0.0901	0.1967	0.3584	0.6624	1.5282	0.0974	0.1594	0.0879			time (h)	cartilage-like layer			bone-like layer					75	Contr. S2 24h	0.1594	2.74327	553.688	5536.88	5.53688
0.0053	0.0339	0.0399	0.0698	0.1165	0.2321	0.4448	0.7285		0.3526	0.2778	0.2942			6	1.6382	6.06	10.85	4.53	5.45	3.44			76	Contr. S3 24h	0.0879	2.48274	303.909	3039.09	3.03909
0.0229	0.0876	0.1563	0.0652	0.0787	0.0492	0.2541	0.3095	0.2286	0.1108	0.1093	0.1072			24	9.03	11.2	8.07	3.83	3.78	3.7			77	Contr. S1 48h	0.3526	3.11247	1295.59	6477.97	6.47797
0.22	0.5437	0.3393	0.0895	0.2661	0.1	0.2506	0.3437	0.2479	0.1015	0.1046	0.0682			48	3.87	10.84	6.2	1.55	4.75	1.73			78	Contr. S2 48h	0.2778	2.99761	994.512	4972.56	4.97256
0.2118	0.3246	0.2486	0.1393	0.1195	0.1106	0.3075	0.3941	0.2726	0.1217	0.1296	0.0924			72	4.45	6.29	4.4	1.75	1.81	1.18			79	Contr. S3 48h	0.2942	3.02484	1058.87	5294.37	5.29437
0.1198	0.2201	0.2234	0.1149	0.1089	0.1114	0.2234	0.2991	0.2111	0.0997	0.0995	0.0744			96	3.72	5.9		2.41	2.07	1.91
0.1352	0.4365	0.1427	0.1221	0.1039	0.1176	0.5079	0.3574	0.1742	0.05	0.0414	0.1615			120	5.56	7.36	4.87	2.1	2.24	1.6
0.0959	0.2209	0.0922	0.0763	0.1201	0.0634	0.0657	0.853	0.0724	0.4459	0.2787	0.9443			144	2.07	3.87	3.94	1.99	1.88	1.92
														168	3.94	5.39	3.71	1.72	1.72	1.29
														336	2.34	8.29	2.47	2.11	1.8	2.03
PDGF-BB
										Abs 450																		ABS 450
Temperature(¡C)	1	2	3	4	5	6	7	8	9	10	11	12					Temperature(¡C)	1	2	3	4	5	6	7	8	9	10	11	12
25.2	2.6121	2.5022	2.1176	2.2709	1.6513	1.7362	1.0808	1.1843	0.5313	0.504	0.2916	0.2904					24.4	2.5432	2.6353	2.0482	1.8129	1.2647	1.4101	0.9558	0.9308	0.5067	0.4764	0.2624	0.2355
	0.1735	0.1673	0.0911	0.102	1.509	3.2859	0.1148	0.4597	0.102	0.2959	0.093	0.0953						0.1838	0.1856	0.099	0.0935	0.0961	0.1362	0.8912	3.33	0.1523	0.6779	0.0858	0.0793
	0.2505	0.2651	0.0976	0.2163	0.3151	0.4666	2.812	2.7928	2.6315	2.4328	1.8078	2.698						0.3712	0.3761	0.3288	0.3256	0.5372	0.5506	0.2676	0.2901	0.3488	0.3315	0.2217	0.2275
	0.4817	0.4581	0.5315	0.574	0.6467	0.7109	1.2517	1.1865	0.3862	0.426	0.6578	0.5856						0.2808	0.2867	0.4092	0.4221	0.6028	0.5912	0.2641	0.2493	0.261	0.2445	0.2305	0.2104
	0.214	0.1885	0.2413	0.263	0.4081	0.4264	0.2997	0.3287	0.2811	0.269	0.3027	0.2962						1.2884	1.2846	1.7955	1.7236	0.6554	0.8546	1.0178	1.0798	0.5958	0.5063	0.6936	0.6541
	0.2633	0.2583	0.4416	0.492	0.596	0.6178	0.3639	0.3678	0.2129	0.1919	0.2099	0.2024						0.51	0.576	0.5374	0.4237	0.9164	0.9216	0.9613	1.0441	0.4557	0.4878	1.1247	1.0883
	0.1379	0.1412	0.1168	0.1249	0.1007	0.1055	0.3859	0.3933	0.1167	0.1125	0.0969	0.0929						1.1421	1.0901	0.7465	0.7199	3.5631	3.5823	1.362	1.4005	0.162	0.195	0.153	0.1964
	0.3147	0.3523	0.3594	0.3818	0.5175	0.5766	0.2604	0.2591	0.2776	0.2435	0.1841	0.1661						0.146	0.5522	0.1428	0.3119	0.8572	0.572	0.2187	0.2582	0.2456	0.1626	0.2804	0.1365
																												ABS 570
											abs 570							1	2	3	4	5	6	7	8	9	10	11	12
	1	2	3	4	5	6	7	8	9	10	11	12						0.0454	0.0476	0.0436	0.0422	0.0422	0.0452	0.041	0.04	0.0408	0.0397	0.0397	0.0396
	0.0443	0.0498	0.0648	0.0451	0.0419	0.0423	0.0414	0.0448	0.0391	0.0397	0.0385	0.0414						0.0449	0.038	0.0413	0.037	0.0391	0.0388	0.0401	0.0485	0.0431	0.0504	0.0391	0.0394
	0.0382	0.0389	0.0399	0.0418	0.0441	0.0476	0.0401	0.0495	0.0391	0.0423	0.041	0.0394						0.0442	0.0415	0.0424	0.0376	0.0759	0.0434	0.0381	0.058	0.0385	0.0386	0.0391	0.0432
	0.0402	0.0434	0.0388	0.0411	0.0393	0.0578	0.0491	0.0452	0.0461	0.0457	0.0424	0.0926						0.0677	0.0409	0.04	0.0418	0.0422	0.0385	0.0689	0.0379	0.0428	0.0412	0.039	0.0388
	0.0427	0.0395	0.0572	0.0406	0.042	0.0392	0.0395	0.0405	0.04	0.0391	0.0399	0.0412						0.0419	0.0408	0.055	0.042	0.0472	0.0385	0.1238	0.0404	0.0403	0.0399	0.0403	0.039
	0.049	0.0379	0.0452	0.0398	0.0456	0.0381	0.0384	0.0386	0.0385	0.0387	0.0398	0.0478						0.0423	0.0412	0.147	0.0395	0.0416	0.0412	0.0545	0.042	0.0393	0.0459	0.0409	0.0408
	0.0455	0.0415	0.0392	0.0411	0.039	0.0405	0.04	0.0374	0.0386	0.0395	0.0389	0.0399						0.0392	0.0457	0.0428	0.04	0.0496	0.0504	0.0555	0.0572	0.0394	0.0418	0.0395	0.0379
	0.0379	0.0383	0.0421	0.0387	0.0419	0.039	0.0394	0.0406	0.0387	0.0431	0.0418	0.0389						0.0379	0.0435	0.0396	0.0381	0.0497	0.0483	0.0787	0.0596	0.0505	0.0526	0.0403	0.0451
	0.0466	0.0387	0.0402	0.0494	0.0465	0.0476	0.04	0.0409	0.0414	0.041	0.0466	0.0384
	1	2	3	4	5	6	7	8	9	10	11	12	abs 450-570					1	2	3	4	5	6	7	8	9	10	11	12
A	2.5678	2.4524	2.0528	2.2258	1.6094	1.6939	1.0394	1.1395	0.4922	0.4643	0.2531	0.249					A	2.4978	2.5877	2.0046	1.7707	1.2225	1.3649	0.9148	0.8908	0.4659	0.4367	0.2227	0.1959
B	0.1353	0.1284	0.0512	0.0602	1.4649	3.2383	0.0747	0.4102	0.0629	0.2536	0.052	0.0559					B	0.1389	0.1476	0.0577	0.0565	0.057	0.0974	0.8511	3.2815	0.1092	0.6275	0.0467	0.0399
C	0.2103	0.2217	0.0588	0.1752	0.2758	0.4088	2.7629	2.7476	2.5854	2.3871	1.7654	2.6054					C	0.327	0.3346	0.2864	0.288	0.4613	0.5072	0.2295	0.2321	0.3103	0.2929	0.1826	0.1843
D	0.439	0.4186	0.4743	0.5334	0.6047	0.6717	1.2122	1.146	0.3462	0.3869	0.6179	0.5444					D	0.2131	0.2458	0.3692	0.3803	0.5606	0.5527	0.1952	0.2114	0.2182	0.2033	0.1915	0.1716
E	0.165	0.1506	0.1961	0.2232	0.3625	0.3883	0.2613	0.2901	0.2426	0.2303	0.2629	0.2484					E	1.2465	1.2438	1.7405	1.6816	0.6082	0.8161	0.894	1.0394	0.5555	0.4664	0.6533	0.6151
F	0.2178	0.2168	0.4024	0.4509	0.557	0.5773	0.3239	0.3304	0.1743	0.1524	0.171	0.1625					F	0.4677	0.5348	0.3904	0.3842	0.8748	0.8804	0.9068	1.0021	0.4164	0.4419	1.0838	1.0475
G	0.1	0.1029	0.0747	0.0862	0.0588	0.0665	0.3465	0.3527	0.078	0.0694	0.0551	0.054					G	1.1029	1.0444	0.7037	0.6799	3.5135	3.5319	1.3065	1.3433	0.1226	0.1532	0.1135	0.1585
H	0.2681	0.3136	0.3192	0.3324	0.471	0.529	0.2204	0.2182	0.2362	0.2025	0.1375	0.1277					H	0.1081	0.5087	0.1032	0.2738	0.8075	0.5237	0.14	0.1986	0.1951	0.11	0.2401	0.0914
																													standard
		Standard	Average	Average-Blank	Conc. pg/ml	log Conc														average	average-blank	Conc	log Conc
	2.5678	2.4524	2.5101	2.4544	2000	3.30103												2.4978	2.5877	2.54275	2.48625	2000	3.30103
	2.0528	2.2258	2.1393	2.0836	1000	3												2.0046	1.7707	1.88765	1.83115	1000	3
	1.6094	1.6939	1.65165	1.59595	500	2.69897												1.2225	1.3649	1.2937	1.2372	500	2.69897
	1.0394	1.1395	1.08945	1.03375	250	2.39794												0.9148	0.8908	0.9028	0.8463	250	2.39794
	0.4922	0.4643	0.47825	0.42255	125	2.09691												0.4659	0.4367	0.4513	0.3948	125	2.09691
	0.2531	0.249	0.25105	0.19535	62.5	1.79588												0.2227	0.1959	0.2093	0.1528	62.5	1.79588
	0.1353	0.1284	0.13185	0.07615	32.25	1.50853												0.1389	0.1476	0.14325	0.08675	32.25	1.50853
blank	0.0512	0.0602	0.0557	0														0.0577	0.0565	0.0571
	Samples		Average	average-blank	4PL(log)curve-fit	pg/mL uncorrected	pg/ml corrected	corrected ng/ml	in 800 ul										Samples	average	average-blank	4PL(log)curve-fit	pg/ml without correction	pg/ml corrected	ng/ml	800 ul	average leftover	STDEV
B.S1 6h 1:500	0.2103	0.2217	0.216	0.1603	1.74443	55.5181	27759	27.759	22.2072								B.S1 6d undiluted	0.327	0.3346	0.3308	0.2743	1.93273	85.6496		0.0856496	0.0685197
B.S2 6h	0.0588	0.1752	0.117	0.0613	1.51665	32.8584	16429.2	16.4292	13.1434								B.S2 6d	0.2864	0.288	0.2872	0.2307	1.86397	73.1087		0.0731087	0.058487
B.S3 6h	0.2758	0.4088	0.3423	0.2866	1.91803	82.7993	41399.6	41.3996	33.1197								B.S3 6d	0.4613	0.5072	0.48425	0.42775	2.12245	132.572		0.132572	0.106058
C.S1 6h	2.7629	2.7476	2.75525	2.69955													C.S1 6d undiluted	0.2295	0.2321	0.2308	0.1743	1.75866	57.3666		0.0573666	0.0458933
C.S2 6h	2.5854	2.3871	2.48625	2.43055	3.29767	1984.58	992289	992.289	793.831								C.S2 6d	0.3103	0.2929	0.3016	0.2451	1.8877	77.2141		0.0772141	0.0617713
C.S3 6h	1.7654	2.6054	2.1854	2.1297	3.00746	1017.33	508665	508.665	406.932								C.S3 6d	0.1826	0.1843	0.18345	0.12695	1.64886	44.551		0.044551	0.0356408
B.S1 24h 1:100	0.439	0.4186	0.4288	0.3731	2.00584	101.355	10135.5	10.1355	8.10839								B.S1 7d undiluted	0.2131	0.2458	0.22945	0.17295	1.75585	56.9962		0.0569962	0.045597
B.S2 24h	0.4743	0.5334	0.50385	0.44815	2.07062	117.659	11765.9	11.7659	9.41268								B.S2 7d	0.3692	0.3803	0.37475	0.31825	1.99402	98.6336		0.0986336	0.0789069
B.S3 24h	0.6047	0.6717	0.6382	0.5825	2.16965	147.791	14779.1	14.7791	11.8233								B.S3 7d	0.5606	0.5527	0.55665	0.50015	2.1941	156.35		0.15635	0.12508
C.S1 24h	1.2122	1.146	1.1791	1.1234	2.46988	295.038	29503.8	29.5038	23.603								C.S1 7d undiluted	0.1952	0.2114	0.2033	0.1468	1.69793	49.8801		0.0498801	0.0399041
C.S2 24h	0.3462	0.3869	0.36655	0.31085	1.94443	87.99	8799	8.799	7.0392								C.S2 7d	0.2182	0.2033	0.21075	0.15425	1.71514	51.8963		0.0518963	0.041517
C.S3 24h	0.6179	0.5444	0.58115	0.52545	2.12973	134.813	13481.3	13.4813	10.7851								C.S3 7d	0.1915	0.1716	0.18155	0.12505	1.64389	44.0441		0.0440441	0.0352353
B.S1 48h 1:10	0.165	0.1506	0.1578	0.1021	1.62797	42.4591	424.591	0.424591	0.339672
B.S2 48h	0.1961	0.2232	0.20965	0.15395	1.73334	54.1175	541.175	0.541175	0.43294
B.S3 48h	0.3625	0.3883	0.3754	0.3197	1.95369	89.8853	898.853	0.898853	0.719083
C.S1 48h	0.2613	0.2901	0.2757	0.22	1.83574	68.5082	685.082	0.685082	0.548066
C.S2 48h	0.2426	0.2303	0.23645	0.18075	1.77815	59.9997	599.997	0.599997	0.479997
C.S3 48h	0.2629	0.2484	0.25565	0.19995	1.80736	64.1744	641.744	0.641744	0.513395
B.S1 3d 1:5	0.2178	0.2168	0.2173	0.1616	1.74667	55.8043	279.021	0.279021	0.223217
B.S2 3d	0.4024	0.4509	0.42665	0.37095	2.00385	100.892	504.458	0.504458	0.403566
B.S3 3d	0.557	0.5773	0.56715	0.51145	2.1195	131.673	658.364	0.658364	0.526692
C.S1 3d	0.3239	0.3304	0.32715	0.27145	1.90067	79.556	397.78	0.39778	0.318224
C.S2 3d	0.1743	0.1524	0.16335	0.10765	1.64078	43.7304	218.652	0.218652	0.174922
C.S3 3d	0.171	0.1625	0.16675	0.11105	1.64842	44.506	222.53	0.22253	0.178024
B.S1 4d undiluted	0.1	0.1029	0.10145	0.04575	1.46303	29.0419		0.0290419	0.0232335
B.S2 4d undiluted	0.0747	0.0862	0.08045	0.02475	1.37445	23.6836		0.0236836	0.0189468
B.S3 4d 1:20	0.0588	0.0665	0.06265	0.00695	1.27606	18.8827	377.654	0.377654	0.302123
C.S1 4d undiluted	0.3465	0.3527	0.3496	0.2939	1.92615	84.3617		0.0843617	0.0674893
C.S2 4d 1:20	0.078	0.0694	0.0737	0.018	1.34038	21.8966	437.933	0.437933	0.350346
C.S3 4d 1:20	0.0551	0.054	0.05455	-0.00115
B.S1 5d undiluted	0.2681	0.3136	0.29085	0.23515	1.85594	71.7698		0.0717698	0.0574158
B.S2 5d undiluted	0.3192	0.3324	0.3258	0.2701	1.89909	79.2668		0.0792668	0.0634135
B.S3 5d undiluted	0.471	0.529	0.5	0.4443	2.0675	116.815		0.116815	0.0934519
C.S1 5d undiluted	0.2204	0.2182	0.2193	0.1636	1.75008	56.2441		0.0562441	0.0449953
C.S2 5d undiluted	0.2362	0.2025	0.21935	0.16365	1.75016	56.2551		0.0562551	0.0450041
C.S3 5d undiluted	0.1375	0.1277	0.1326	0.0769	1.56336	36.5897		0.0365897	0.0292718
final calculated concentration
PDGF-BB (ng)
time (h)	Bone-like layer			Cartilage-like layer
6	22.2072	13.1434	33.1197		793.831	406.932
24	8.10839	9.41268	11.8233	23.603	7.0392	10.7851
48	0.339672	0.43294	0.719083	0.548066	0.479997	0.513395
72	0.223217	0.403566	0.526692	0.318224	0.174922	0.178024
96	0.023234	0.018947	0.302123	0.067489	0.350346
120	0.057416	0.063413	0.093452	0.044995	0.045004	0.029272
144	0.06852	0.058487	0.106058	0.045893	0.061771	0.035641
168	0.045597	0.078907	0.12508	0.039904	0.041517	0.035235
B.S2 6d	0.2864	0.288	0.2872	0.2307	1.86397	73.1087		0.0731087	0.058487
B.S3 6d	0.4613	0.5072	0.48425	0.42775	2.12245	132.572		0.132572	0.106058
C.S1 6d undiluted	0.2295	0.2321	0.2308	0.1743	1.75866	57.3666		0.0573666	0.0458933
C.S2 6d	0.3103	0.2929	0.3016	0.2451	1.8877	77.2141		0.0772141	0.0617713
C.S3 6d	0.1826	0.1843	0.18345	0.12695	1.64886	44.551		0.044551	0.0356408
B.S1 7d undiluted	0.2131	0.2458	0.22945	0.17295	1.75585	56.9962		0.0569962	0.045597
B.S2 7d	0.3692	0.3803	0.37475	0.31825	1.99402	98.6336		0.0986336	0.0789069
B.S3 7d	0.5606	0.5527	0.55665	0.50015	2.1941	156.35		0.15635	0.12508
C.S1 7d undiluted	0.1952	0.2114	0.2033	0.1468	1.69793	49.8801		0.0498801	0.0399041
C.S2 7d	0.2182	0.2033	0.21075	0.15425	1.71514	51.8963		0.0518963	0.041517
C.S3 7d	0.1915	0.1716	0.18155	0.12505	1.64389	44.0441		0.0440441	0.0352353

## Sheet: cell in growth ex vivo
		cell number infiltrated into the scaffold (counted under microscopy)
conditions	slide no.	cell number first observation	cell number second observation	average
scaffold only	2022-0239	47	56	51.5
scaffold only	2022-0240	49	63	56
scaffold only	2022-0241	79	75	77
scaffold only	2022-0242	59	51	55
BMP-2	2022-0243	121	125	123
BMP-2	2022-0244	195	211	203
BMP-2	2022-0245	73	87	80
BMP-2	2022-0246	92	90	91
PDGF-BB	2022-0247	84	75	79.5
PDGF-BB	2022-0248	70	54	62
PDGF-BB	2022-0249	268	245	256.5
PDGF-BB	2022-0250	291	271	281

## Sheet: 4, 8 weeks mouse model in vivo
4 weeks tissue repair						observer 1			observer 2			average of two observers			average of three sections
Conditie	Name		coupe	plug	depth	scaffold / defect	Saf O / defect	Saf O / defect cartilage region	scaffold / defect	Saf O / defect	Saf O / defect cartilage region	scaffold / defect	Saf O / defect	Saf O / defect cartilage region	gem opp scaffold / opp defect in totaa	gem opp scaffold / opp defect in totaa	gem opp. saf o / opp defect	gem opp. saf o / opp defect	gem opp. saf o / opp defect cartilage region	gem opp. saf o / opp defect cartilage region
B	2019-0842	scaffold + BMP2 (4 ug)	1	I	1/6th in	0.645201	0	0	0.629245	0	0	0.637223	0	0	0.573097	0.0932735	0	0	0	0
B	2019-0848	scaffold + BMP2 (4 ug)	2	II	1/6th in	0.814723	0.165968	0.0943303	0.832381	0.209971	0.112531	0.823552	0.18797	0.103431	0.715438	0.232173	0.186838	0.0147586	0.0904614	0.0455399
B	2019-0842	scaffold + BMP2 (4 ug)	3	I	1/3rd	0.589184	0	0	0.642762	0	0	0.615973	0	0
B	2019-0848	scaffold + BMP2 (4 ug)	4	II	1/3rd	0.914749	0.160061	0.0914363	0.832925	0.241935	0.164784	0.873837	0.200998	0.12811
B	2019-0842	scaffold + BMP2 (4 ug)	5	I	center	0.607462	0	0	0.324728	0	0	0.466095	0	0
B	2019-0848	scaffold + BMP2 (4 ug)	6	II	center	0.476984	0.151126	0.0224376	0.420863	0.191966	0.05725	0.448924	0.171546	0.0398438
B	2019-0853	scaffold + BMP2 (4 ug)	1	I	1/6th in	0.950677	0.207377	0.220633	1	0.197167	0.200778	0.975339	0.202272	0.210705	0.983881	0.00834824	0.19978	0.0164924	0.230655	0.0982926
B	2019-0859	scaffold + BMP2 (4 ug)	2	II	1/6th in	0.557766	0	0	0.337826	0	0	0.447796	0	0	0.49885	0.0722016	0	0	0	0
B	2019-0853	scaffold + BMP2 (4 ug)	3	I	1/3rd	0.968566	0.223951	0.179357	1	0.20582	0.108378	0.984283	0.214885	0.143868
B	2019-0859	scaffold + BMP2 (4 ug)	4	II	1/3rd	x	x	x	x	x	x	x	x	x
B	2019-0853	scaffold + BMP2 (4 ug)	5	I	center	0.984041	0.176275	0.3058	1	0.188093	0.368984	0.99202	0.182184	0.337392
B	2019-0859	scaffold + BMP2 (4 ug)	6	II	center	0.595445	0	0	0.504364	0	0	0.549905	0	0
C	2019-0843	scaffold + PDGF (2 ug)	1	I	1/6th in	0.971846	0.520847	0.586926	1	0.489921	0.538732	0.985923	0.505384	0.562829	0.859374	0.111472	0.22006	0.247891	0.22653	0.292064
C	2019-0845	scaffold + PDGF (2 ug)	2	II	1/6th in	0.430701	0	0	0.272222	0	0	0.351462	0	0	0.425919	0.072257	0	0	0	0
C	2019-0843	scaffold + PDGF (2 ug)	3	I	1/3rd	0.789534	0.0952537	0.0765042	0.843411	0.0991809	0.084	0.816472	0.0972173	0.0802521
C	2019-0845	scaffold + PDGF (2 ug)	4	II	1/3rd	0.494614	0	0	0.366471	0	0	0.430542	0	0
C	2019-0843	scaffold + PDGF (2 ug)	5	I	center	0.764585	0.0639596	0.0430193	0.786867	0.0512	0.03	0.775726	0.0575798	0.0365097
C	2019-0845	scaffold + PDGF (2 ug)	6	II	center	0.515735	0	0	0.475772	0	0	0.495754	0	0
C	2019-0850	scaffold + PDGF (2 ug)	1	I	1/6th in	0.837271	0.00874183	0	0.777937	0.00661891	0	0.807604	0.00768037	0	0.623507	0.311242	0.00256012	0.00443426	0	0
C	2019-0856	scaffold + PDGF (2 ug)	2	II	1/6th in	0.795131	0.051604	0.00999045	0.665392	0.0602417	0.040892	0.730261	0.0559228	0.0254412	0.779932	0.0580326	0.0789864	0.032274	0.0113376	0.0129442
C	2019-0850	scaffold + PDGF (2 ug)	3	I	1/3rd	0.865823	0	0	0.731707	0	0	0.798765	0	0
C	2019-0856	scaffold + PDGF (2 ug)	4	II	1/3rd	0.844585	0.0612501	0.00582732	0.842857	0.0690848	0.0113158	0.843721	0.0651674	0.00857156
C	2019-0850	scaffold + PDGF (2 ug)	5	I	center	0.338207	0	0	0.190098	0	0	0.264152	0	0
C	2019-0856	scaffold + PDGF (2 ug)	6	II	center	0.785479	0.111469	0	0.746146	0.120269	0	0.765812	0.115869	0
D	2019-0844	scaffold + PDGF (100 ng)	1	I	1/6th in	0.73959	0	0	0.473714	0	0	0.606652	0	0	0.540202	0.0763694	0	0	0	0
D	2019-0849	scaffold + PDGF (100 ng)	2	II	1/6th in	0.969884	0.280849	0	1	0.296852	0	0.984942	0.288851	0	0.823391	0.140411	0.201903	0.0789523	0	0
D	2019-0844	scaffold + PDGF (100 ng)	3	I	1/3rd	0.647433	0	0	0.466929	0	0	0.557181	0	0
D	2019-0849	scaffold + PDGF (100 ng)	4	II	1/3rd	0.806496	0.178497	0	0.7025	0.185833	0	0.754498	0.182165	0
D	2019-0844	scaffold + PDGF (100 ng)	5	I	center	0.47973	0	0	0.433813	0	0	0.456772	0	0
D	2019-0849	scaffold + PDGF (100 ng)	6	II	center	0.789116	0.124339	0	0.672348	0.145043	0	0.730732	0.134691	0
D	2019-0855	scaffold + PDGF (100 ng)	1	I	1/6th in	0.842026	0	0	0.860191	0	0	0.851109	0	0	0.705358	0.206122	0	0	0	0
D	2019-0858	scaffold + PDGF (100 ng)	2	II	1/6th in	0.523266	0	0	0.355224	0	0	0.439245	0	0	0.480445	0.103316	0	0	0	0
D	2019-0855	scaffold + PDGF (100 ng)	3	I	1/3rd	0.613856	0	0	0.50536	0	0	0.559608	0	0
D	2019-0858	scaffold + PDGF (100 ng)	4	II	1/3rd	0.45402	0	0	0.354151	0	0	0.404086	0	0
D	2019-0855	scaffold + PDGF (100 ng)	5	I	center	x	x	x	x	x	x	x	x	x
D	2019-0858	scaffold + PDGF (100 ng)	6	II	center	0.668551	0	0	0.527459	0	0	0.598005	0	0
E	2019-0846	scaffold only	1	I	1/6th in	0.661355	0	0	0.4615	0	0	0.561428	0	0	0.597748	0.035784	0	0	0	0
E	2019-0851	scaffold only	2	II	1/6th in	0.695759	0	0	0.456835	0	0	0.576297	0	0	0.625609	0.0428916	0	0	0	0
E	2019-0846	scaffold only	3	I	1/3rd	0.616134	0	0	0.58156	0	0	0.598847	0	0
E	2019-0851	scaffold only	4	II	1/3rd	0.668418	0	0	0.624121	0	0	0.646269	0	0
E	2019-0846	scaffold only	5	I	center	0.811715	0	0	0.454225	0	0	0.63297	0	0
E	2019-0851	scaffold only	6	II	center	0.662758	0	0	0.645761	0	0	0.65426	0	0
E	2019-0854	scaffold only	1	I	1/6th in	0.68984	0	0	0.704079	0	0	0.69696	0	0	0.653752	0.0386037	0	0	0	0
E	2019-0857	scaffold only	2	II	1/6th in	0.769926	0	0	0.72381	0	0	0.746868	0	0	0.620438	0.111973	0	0	0	0
E	2019-0854	scaffold only	3	I	1/3rd	0.657972	0	0	0.587344	0	0	0.622658	0	0
E	2019-0857	scaffold only	4	II	1/3rd	0.554627	0	0	0.512932	0	0	0.53378	0	0
E	2019-0854	scaffold only	5	I	center	0.63039	0	0	0.652885	0	0	0.641637	0	0
E	2019-0857	scaffold only	6	II	center	0.611694	0	0	0.54964	0	0	0.580667	0	0
8 weeks tissue repair												average of three sections
condition	plug	depth	bone+cartilage	bone	cartilage	defect	scaffold	cartilage/defect	bone/defect	cartilage+bone/defect	scaffold/defect	cartilage/defect-average	bone/defect-average	cartilage+bone/defect-average	scaffold/defect-average
scaffold + BMP2	2021-0094	1	14.534	11.9631	2.57096	14.5437	0	0.176775	0.82256	0.999335	0	0.233886	0.744855	0.978741	0.0152899
scaffold + BMP2	2021-0094	2	17.4087	13.5729	3.83584	17.9661	0.417875	0.213505	0.755474	0.968978	0.0232591
scaffold + BMP2	2021-0094	3	16.7453	11.3583	5.38699	17.3005	0.391174	0.311378	0.656531	0.967909	0.0226106
scaffold + BMP2	2021-0097	1	13.62	13.3505	0.269499	15.6459	1.9387	0.0172249	0.853293	0.870517	0.123911	0.0117737	0.860661	0.872435	0.116708
scaffold + BMP2	2021-0097	2	13.9851	13.8619	0.12319	16.2922	2.24375	0.00756129	0.850829	0.85839	0.137719
scaffold + BMP2	2021-0097	3	13.8465	13.6823	0.164196	15.586	1.37927	0.0105349	0.877861	0.888396	0.0884942
scaffold + BMP2	2021-0104	1	4.44126	2.83646	1.6048	12.0953	5.93129	0.13268	0.23451	0.36719	0.490381	0.111721	0.247975	0.359695	0.516403
scaffold + BMP2	2021-0104	2	6.01325	4.52323	1.49002	15.489	6.59672	0.0961988	0.292029	0.388228	0.425898
scaffold + BMP2	2021-0104	3	6.13093	4.11773	2.0132	18.942	11.9889	0.106282	0.217386	0.323668	0.632929
scaffold + BMP2	2021-0105	1	9.23035	1.75316	7.47719	18.2752	8.97136	0.409144	0.0959314	0.505076	0.490904	0.439187	0.150941	0.590128	0.39277
scaffold + BMP2	2021-0105	2	11.1193	3.01932	8.09995	18.8241	7.62476	0.430297	0.160396	0.590693	0.405053
scaffold + BMP2	2021-0105	3	10.0573	2.9294	7.12786	14.9081	4.20934	0.47812	0.196497	0.674616	0.282352
scaffold + BMP2	2021-0111	1	8.56133	5.80898	2.75236	9.44059	0.857972	0.291545	0.615319	0.906864	0.0908812	0.227577	0.617844	0.845421	0.13518
scaffold + BMP2	2021-0111	2	10.7105	8.62411	2.08641	13.7171	2.26354	0.152103	0.628711	0.780813	0.165016
scaffold + BMP2	2021-0111	3	11.4627	8.23313	3.22953	13.5079	2.02138	0.239084	0.609503	0.848587	0.149644
scaffold + BMP2	2021-0090	1	11.1499	10.0227	1.12717	11.8555	0.635766	0.095076	0.845407	0.940483	0.0536264	0.0676373	0.80852	0.876157	0.119389
scaffold + BMP2	2021-0090	2	13.1674	12.2929	0.874516	15.4867	2.30353	0.0564689	0.793773	0.850242	0.148742
scaffold + BMP2	2021-0090	3	13.6076	12.7732	0.83436	16.2431	2.53063	0.0513672	0.786379	0.837746	0.155798
scaffold + BMP2	2021-0113	1	19.1113	16.9255	2.18583	19.1712	0	0.114016	0.88286	0.996877	0	0.201649	0.795308	0.996957	0
scaffold + BMP2	2021-0113	2	20.4445	15.6349	4.8096	20.5078	0	0.234525	0.762388	0.996913	0
scaffold + BMP2	2021-0113	3	20.7504	15.4143	5.33606	20.8111	0	0.256404	0.740677	0.997081	0
scaffold + BMP2 + PDGF	2021-0086	1	12.6978	11.0809	1.61691	15.328	2.05493	0.105488	0.72292	0.828407	0.134064	0.0662418	0.738043	0.804284	0.154293
scaffold + BMP2 + PDGF	2021-0086	2	11.6411	10.6386	1.00254	14.0022	1.80935	0.0715984	0.759779	0.831377	0.129219
scaffold + BMP2 + PDGF	2021-0086	3	7.35314	7.14185	0.211291	9.76424	1.9489	0.0216393	0.73143	0.753069	0.199596
scaffold + BMP2 + PDGF	2021-0096	1	16.1719	11.4667	4.70523	17.1574	0.98151	0.274239	0.668323	0.942561	0.0572061	0.254678	0.699423	0.954101	0.0372548
scaffold + BMP2 + PDGF	2021-0096	2	14.8766	10.1673	4.70925	15.2645	0.238824	0.30851	0.666076	0.974585	0.0156457
scaffold + BMP2 + PDGF	2021-0096	3	13.5022	10.9124	2.58979	14.2857	0.555891	0.181286	0.763871	0.945156	0.0389125
scaffold + BMP2 + PDGF	2021-0099	1	7.0185	6.85063	0.167872	13.9922	3.47183	0.0119975	0.489603	0.501601	0.248126	0.004709	0.630325	0.635034	0.164571
scaffold + BMP2 + PDGF	2021-0099	2	11.2194	11.1848	0.034555	16.2271	2.4956	0.00212947	0.689269	0.691398	0.153792
scaffold + BMP2 + PDGF	2021-0099	3	11.8672	11.8672	0	16.665	1.52975	0	0.712103	0.712103	0.0917944
scaffold + BMP2 + PDGF	2021-0103	1	6.70066	4.70366	1.997	8.95449	0	0.223017	0.525285	0.748303	0	0.150993	0.433755	0.584747	0.266831
scaffold + BMP2 + PDGF	2021-0103	2	5.03901	4.12976	0.909244	9.64234	3.73889	0.094297	0.428295	0.522592	0.387758
scaffold + BMP2 + PDGF	2021-0103	3	6.54257	4.70623	1.83634	13.5359	5.58675	0.135664	0.347684	0.483348	0.412734
scaffold + BMP2 + PDGF	2021-0108	1	12.3084	8.83349	3.47489	14.7277	2.34478	0.235943	0.599788	0.835731	0.159209	0.224008	0.609963	0.833971	0.160667
scaffold + BMP2 + PDGF	2021-0108	2	13.1052	9.46856	3.63667	15.7755	2.59322	0.230527	0.600208	0.830735	0.164383
scaffold + BMP2 + PDGF	2021-0108	3	13.747	10.3647	3.3823	16.4546	2.60658	0.205553	0.629893	0.835446	0.15841
scaffold + BMP2 + PDGF	2021-0109	1	0.28829	0.28829	0	6.94362	5.92995	0	0.0415187	0.0415187	0.854014	0.00120854	0.0421808	0.0433894	0.858998
scaffold + BMP2 + PDGF	2021-0109	2	0.645584	0.645584	0	8.90446	6.96196	0	0.0725012	0.0725012	0.781852
scaffold + BMP2 + PDGF	2021-0109	3	0.180184	0.139729	0.040455	11.1581	10.5012	0.00362561	0.0125226	0.0161482	0.941129
scaffold + PDGF	2021-0087	1	1.86043	1.86043	0	15.8841	11.446	0	0.117125	0.117125	0.720591	0	0.0911566	0.0911566	0.735632
scaffold + PDGF	2021-0087	2	1.20405	1.20405	0	17.9139	13.4828	0	0.0672132	0.0672132	0.752646
scaffold + PDGF	2021-0087	3	1.57854	1.57854	0	17.7102	12.9932	0	0.0891318	0.0891318	0.733659
scaffold + PDGF	2021-0089	1	7.1887	7.1887	0	9.34919	1.8057	0	0.768912	0.768912	0.19314	0	0.692482	0.692482	0.288323
scaffold + PDGF	2021-0089	2	9.51425	9.51425	0	14.2585	4.6754	0	0.66727	0.66727	0.327903
scaffold + PDGF	2021-0089	3	8.27264	8.27264	0	12.9006	4.43682	0	0.641263	0.641263	0.343925
scaffold + PDGF	2021-0093	1	12.9033	12.3208	0.582472	15.0214	1.85839	0.0387762	0.820216	0.858992	0.123716	0.0495981	0.824737	0.874335	0.115707
scaffold + PDGF	2021-0093	2	16.4155	15.6358	0.779628	18.5636	2.08404	0.0419976	0.842285	0.884282	0.112265
scaffold + PDGF	2021-0093	3	16.0954	14.8509	1.24449	18.2958	2.03337	0.0680204	0.811711	0.879732	0.111139
scaffold + PDGF	2021-0102	1	10.9567	7.04303	3.91363	15.6799	3.72574	0.249595	0.449175	0.698771	0.237612	0.158455	0.354724	0.513178	0.429765
scaffold + PDGF	2021-0102	2	9.46195	7.35659	2.10536	19.4612	9.33468	0.108182	0.378013	0.486195	0.479655
scaffold + PDGF	2021-0102	3	6.35886	4.25006	2.1088	17.934	10.2587	0.117586	0.236983	0.35457	0.572027
scaffold + PDGF	2021-0107	1	4.38693	0.907854	3.47908	13.7358	7.36634	0.253285	0.0660939	0.319379	0.536287	0.265344	0.0821847	0.347528	0.540948
scaffold + PDGF	2021-0107	2	6.16663	1.49855	4.66808	17.8283	9.54051	0.261835	0.0840545	0.345889	0.535131
scaffold + PDGF	2021-0107	3	7.26824	1.85706	5.41118	19.2629	10.622	0.280912	0.0964057	0.377317	0.551424
scaffold + PDGF	2021-0112	1	4.01299	1.3633	2.64969	14.2964	8.56163	0.185339	0.0953593	0.280699	0.598866	0.15921	0.129875	0.289085	0.554184
scaffold + PDGF	2021-0112	2	4.61547	1.92562	2.68985	16.6853	8.62135	0.161211	0.115408	0.27662	0.516704
scaffold + PDGF	2021-0112	3	5.89893	3.40415	2.49478	19.0328	10.4106	0.131078	0.178858	0.309936	0.546981
scaffold + PDGF	2021-0114	1	11.9062	8.42143	3.48473	15.5104	3.52964	0.224671	0.542954	0.767624	0.227566	0.236401	0.518418	0.754819	0.242041
scaffold + PDGF	2021-0114	2	14.0121	9.6283	4.38377	18.4931	4.41327	0.23705	0.520644	0.757693	0.238645
scaffold + PDGF	2021-0114	3	14.3888	9.57102	4.81774	19.4669	5.05971	0.247484	0.491656	0.73914	0.259913
scaffold scaffold only	2021-0091	1	7.98624	7.98624	0	10.3228	0.621323	0	0.773654	0.773654	0.0601896	0.00014605	0.796709	0.796855	0.0718955
scaffold scaffold only	2021-0091	2	10.6883	10.6825	0.005846	13.3425	0.650795	0.00043815	0.800638	0.801076	0.0487762
scaffold scaffold only	2021-0091	3	12.9727	12.9727	0	15.9012	1.69699	0	0.815835	0.815835	0.106721
scaffold scaffold only	2021-0088	1	15.2356	14.6046	0.630951	15.4017	0	0.0409664	0.948249	0.989215	0	0.0363621	0.952663	0.989025	0.00589645
scaffold scaffold only	2021-0088	2	15.1561	14.9553	0.200808	15.2332	0.042697	0.0131823	0.981757	0.994939	0.00280289
scaffold scaffold only	2021-0088	3	17.2804	16.3146	0.965839	17.5807	0.261714	0.0549375	0.927983	0.98292	0.0148865
scaffold scaffold only	2021-0100	1	0.170848	0.144774	0.026074	6.3857	5.89707	0.00408318	0.0226716	0.0267548	0.92348	0.00231824	0.00790337	0.0102216	0.901115
scaffold scaffold only	2021-0100	2	0.008321	0.001978	0.006343	8.75768	7.67743	0.000724279	0.000225859	0.000950137	0.876651
scaffold scaffold only	2021-0100	3	0.025816	0.007088	0.018728	8.72185	7.87769	0.00214725	0.000812671	0.00295992	0.903212
scaffold scaffold only	2021-0101	1	14.0173	13.5486	0.468628	14.7109	0.133106	0.0318559	0.920994	0.95285	0.00904813	0.0261999	0.89259	0.918789	0.0519335
scaffold scaffold only	2021-0101	2	15.8947	15.5023	0.39239	18.1308	1.35211	0.0216422	0.855029	0.876671	0.0745754
scaffold scaffold only	2021-0101	3	17.0603	16.5983	0.462041	18.4068	1.32855	0.0251016	0.901746	0.926848	0.0721769
scaffold scaffold only	2021-0106	1	5.53159	3.3785	2.15309	8.09965	2.48505	0.265826	0.417117	0.682942	0.30681	0.279442	0.459379	0.73882	0.253659
scaffold scaffold only	2021-0106	2	9.91211	6.22409	3.68802	13.5008	3.54325	0.273171	0.461017	0.734189	0.262448
scaffold scaffold only	2021-0106	3	12.7282	7.96185	4.76638	15.9236	3.05285	0.299328	0.500003	0.799331	0.191718
scaffold scaffold only	2021-0110	1	8.07056	2.7613	5.30925	16.4387	6.00508	0.322973	0.167976	0.490949	0.365302	0.269364	0.119796	0.38916	0.474457
scaffold scaffold only	2021-0110	2	6.93964	1.65044	5.2892	19.0434	9.89034	0.277744	0.0866671	0.364411	0.519357
scaffold scaffold only	2021-0110	3	5.93536	1.99188	3.94349	19.0162	10.2443	0.207375	0.104746	0.312121	0.538711
scaffold scaffold only	2021-0115	1	10.7349	9.22649	1.5084	10.78	0	0.139926	0.855892	0.995818	0	0.159258	0.811174	0.970432	0
scaffold scaffold only	2021-0115	2	15.3985	12.6539	2.74463	15.7453	0	0.174314	0.803658	0.977972	0
scaffold scaffold only	2021-0115	3	16.3911	13.5319	2.85918	17.4838	0	0.163533	0.773972	0.937505	0
4 weeks IHC ranking
group	condition	samples	MPO	iNOS	F4/80
2	scaffold scaffold only	2019-0846	8	7	2
2	scaffold scaffold only	2019-0851	10	6	5
2	scaffold scaffold only	2019-0857	2	1	10
2	scaffold scaffold only	2019-0854	4	8	16
3	scaffold + BMP2 (4 ug)	2019-0842	3	3	7
3	scaffold + BMP2 (4 ug)	2019-0859	5	5	8
3	scaffold + BMP2 (4 ug)	2019-0848	0	0	9
3	scaffold + BMP2 (4 ug)	2019-0853	0	0	12
4	scaffold + PDGF (100 ng)	2019-0844	9	9	3
4	scaffold + PDGF (100 ng)	2019-0858	7	10	6
4	scaffold + PDGF (100 ng)	2019-0855	0	4	13
4	scaffold + PDGF (100 ng)	2019-0849	0	0	4
5	scaffold + PDGF (2 ug)	2019-0845	6	11	1
5	scaffold + PDGF (2 ug)	2019-0850	1	2	15
5	scaffold + PDGF (2 ug)	2019-0856	0	0	11
5	scaffold + PDGF (2 ug)	2019-0843	0	0	14

## Sheet: 6 months caprine model in vivo
macroscopic scores
observer 1		2021-04-27				2021-04-28				2021-04-27				2021-04-26				2021-04-27				2021-04-26				2021-04-28				2021-04-28				2021-04-26				2021-04-29
		066C				067E				077F				080B				086E				096F				104D				105F				106H				110F
		left		right		left		right		left		right		left		right		left		right		left		right		left		right		left		right		left		right		left		right
		LTG	LFC	RTG	RFC	LTG	LFC	RTG	RFC	LTG	LFC	RTG	RFC	LTG	LFC	RTG	RFC	LTG	LFC	RTG	RFC	LTG	LFC	RTG	RFC	LTG	LFC	RTG	RFC	LTG	LFC	RTG	RFC	LTG	LFC	RTG	RFC	LTG	LFC	RTG	RFC
		+BMP-2	+BMP-2	scaffold-only	scaffold-only	+BMP-2	+BMP-2	scaffold-only	scaffold-only	+BMP-2	+BMP-2	scaffold-only	scaffold-only	scaffold-only	scaffold-only	+BMP-2	+BMP-2	+BMP-2	+BMP-2	scaffold-only	scaffold-only	scaffold-only	scaffold-only	+BMP-2	+BMP-2	+BMP-2	+BMP-2	scaffold-only	scaffold-only	scaffold-only	scaffold-only	+BMP-2	+BMP-2	scaffold-only	scaffold-only	+BMP-2	+BMP-2	scaffold-only	scaffold-only	+BMP-2	+BMP-2
	Parameter
	Degree of defect repair	4	4	4	4	4	4	4	4	4	4	4	4	4	4	4	4	4	4	4	4	3	4	3	3	4	4	4	4	4	4	4	4	3	4	4	4	4	4	4	4
	Integration to border zone	4	4	4	4	4	4	4	4	4	4	3	4	4	4	4	4	4	3	4	4	4	3	3	2	4	4	3	3	4	4	4	4	4	4	4	4	4	4	4	4
	Macroscopic appearance	4	4	4	4	4	4	4	3	4	4	4	3	4	4	4	3	3	3	3	3	3	3	3	2	3	4	4	4	3	4	4	4	3	3	4	4	4	4	4	4
	Overall repair assessment (0-12)	12	12	12	12	12	12	12	11	12	12	11	11	12	12	12	11	11	10	11	11	10	10	9	7	11	12	11	11	11	12	12	12	10	11	12	12	12	12	12	12
		I	I	I	I	I	I	I	II	I	I	II	II	I	I	I	II	II	II	II	II	II	II	II	II	II	I	II	II	II	I	I	I	II	II	I	I	I	I	I	I
	Parameter
	Colour of the tissue repair	4	4	4	4	4	4	4	4	4	4	4	4	4	4	4	4	4	4	4	4	4	3	4	3	4	4	4	4	4	4	4	4	4	4	4	4	4	4	4	4
	Presence of blood vessels in the repair tissue	4	4	4	4	4	4	4	4	4	4	4	4	4	4	4	4	4	4	4	4	4	4	4	4	4	4	4	4	4	4	4	4	4	4	4	4	4	4	4	4
	Degeneration of adjacent articular cartilage	4	4	4	4	4	4	4	4	4	4	4	4	4	4	4	4	4	4	4	4	4	4	4	4	4	4	4	4	4	4	4	4	4	4	4	4	4	4	4	4
	Surface of the repair tissue	4	4	3	3	4	4	4	3	4	4	3	3	4	3	4	3	3	3	3	3	3	3	3	3	3	4	3	3	3	4	4	4	3	3	4	3	4	4	3	3
	Percentage of defect filling	4	4	4	4	4	4	4	4	4	4	4	4	4	4	4	4	4	4	4	4	4	4	4	3	4	4	4	4	4	4	4	4	4	4	4	4	4	4	4	4
	Overall repair assessment	20	20	19	19	20	20	20	19	20	20	19	19	20	19	20	19	19	19	19	19	19	18	19	17	19	20	19	19	19	20	20	20	19	19	20	19	20	20	19	19
		I	I	II	II	I	I	I	II	II	I	II	II	I	II	I	II	II	II	II	II	II	II	II	II	II	I	II	II	II	I	I	I	II	II	I	II	I	I	II	II
		4	2	3	1	3	1	4	2	4	2	3	1	3	1	4	2	4	2	3	1	3	1	4	2	4	2	3	1	3	1	4	2	3	1	4	2	3	1	4	2
observer 2
	Parameter
	Degree of defect repair	4	4	3	4	4	4	4	4	4	4	4	4	4	4	4	3	4	4	4	4	4	4	4	2	4	4	4	4	4	4	4	4	4	4	4	4	4	4	4	4
	Integration to border zone	3	4	4	3	4	4	4	4	4	4	4	3	3	3	4	4	4	4	3	3	4	4	4	1	3	4	3	4	4	4	3	4	4	4	4	4	4	4	4	4
	Macroscopic appearance	4	2	3	2	4	3	4	1	4	4	4	3	4	2	4	1	4	3	4	3	4	2	4	1	3	2	3	4	4	2	4	2	4	2	4	1	4	3	4	3
	Overall repair assessment (0-12)	11	10	10	9	12	11	12	9	12	12	12	10	11	9	12	8	12	11	11	10	12	10	12	4	10	10	10	12	12	10	11	10	12	10	12	9	12	11	12	11
		II	II	II	II	I	II	I	II	I	I	I	II	II	II	I	II	I	II	II	II	I	II	I	III	II	II	II	I	I	II	II	II	I	II	I	II	I	II	I	II
	Colour of the tissue repair	4	4	4	4	4	4	4	3	4	4	4	4	4	4	4	4	4	4	4	4	3	4	3	2	4	4	4	4	4	4	4	4	2	4	4	4	4	4	3	4
	Presence of blood vessels in the repair tissue	4	4	4	4	4	4	4	4	4	4	4	4	4	4	4	4	4	4	4	4	4	4	4	2	4	4	4	4	4	4	4	4	3	4	4	4	4	4	4	4
	Degeneration of adjacent articular cartilage	4	4	4	4	4	4	4	4	4	4	4	4	4	3	4	4	4	4	4	4	4	4	4	3	4	4	3	4	4	4	4	4	4	4	4	4	4	4	4	4
	Surface of the repair tissue	4	3	3	3	4	3	3	3	3	3	3	3	3	2	3	2	3	3	3	3	3	2	3	1	3	3	3	3	3	2	3	3	3	3	3	2	3	2	3	3
	Percentage of defect filling	4	4	4	4	4	4	4	4	4	4	4	4	4	4	4	4	4	4	4	4	4	4	4	2	4	4	4	4	4	4	4	4	4	4	4	4	4	4	4	4
	Overall repair assessment	20	19	19	19	20	19	19	18	19	19	19	19	19	17	19	18	19	19	19	19	18	18	18	10	19	19	18	19	19	18	19	19	16	19	19	18	19	18	18	19
		I	II	II	II	I	II	II	II	II	II	II	II	II	II	II	II	II	II	II	II	II	II	II	III	I	II	II	II	II	II	II	II	II	II	II	II	II	II	II	II
	Parameter
combined	Degree of defect repair	4	4	3.5	4	4	4	4	4	4	4	4	4	4	4	4	3.5	4	4	4	4	3.5	4	3.5	2.5	4	4	4	4	4	4	4	4	3.5	4	4	4	4	4	4	4
	Integration to border zone	3.5	4	4	3.5	4	4	4	4	4	4	3.5	3.5	3.5	3.5	4	4	4	3.5	3.5	3.5	4	3.5	3.5	1.5	3.5	4	3	3.5	4	4	3.5	4	4	4	4	4	4	4	4	4
	Macroscopic appearance	4	3	3.5	3	4	3.5	4	2	4	4	4	3	4	3	4	2	3.5	3	3.5	3	3.5	2.5	3.5	1.5	3	3	3.5	4	3.5	3	4	3	3.5	2.5	4	2.5	4	3.5	4	3.5
	Overall repair assessment (0-12)	11.5	11	11	10.5	12	11.5	12	10	12	12	11.5	10.5	11.5	10.5	12	9.5	11.5	10.5	11	10.5	11	10	10.5	5.5	10.5	11	10.5	11.5	11.5	11	11.5	11	11	10.5	12	10.5	12	11.5	12	11.5
	Colour of the tissue repair	4	2	2	2	2	2	2	1.5	2	2	2	2	2	2	2	2	2	2	2	2	1.5	2	1.5	1	2	2	2	2	2	2	2	2	1	2	2	2	2	2	1.5	2
	Presence of blood vessels in the repair tissue	4	4	4	4	4	4	4	4	4	4	4	4	4	4	4	4	4	4	4	4	4	3.5	4	2.5	4	4	4	4	4	4	4	4	3.5	4	4	4	4	4	4	4
	Degeneration of adjacent articular cartilage	4	4	4	4	4	4	4	4	4	4	4	4	4	3.5	4	4	4	4	4	4	4	4	4	3.5	4	4	3.5	4	4	4	4	4	4	4	4	4	4	4	4	4
	Surface of the repair tissue	4	3.5	3.5	3.5	4	3.5	3.5	3.5	3.5	3.5	3.5	3.5	3.5	3	3.5	3	3.5	3.5	3.5	3.5	3.5	3	3.5	2.5	3.5	3.5	3.5	3.5	3.5	3	3.5	3.5	3.5	3.5	3.5	3	3.5	3	3.5	3.5
	Percentage of defect filling	4	4	3.5	3.5	4	4	4	3.5	4	4	3.5	3.5	4	3.5	4	3.5	3.5	3.5	3.5	3.5	3.5	3.5	3.5	2.5	3.5	4	3.5	3.5	3.5	4	4	4	3.5	3.5	4	3.5	4	4	3.5	3.5
	Overall repair assessment	20	19.5	19	19	20	19.5	19.5	18.5	19.5	19.5	19	19	19.5	18	19.5	18.5	19	19	19	19	18.5	18	18.5	13.5	19	19.5	18.5	19	19	19	19.5	19.5	17.5	19	19.5	18.5	19.5	19	18.5	19
groups	ICRS Overall repair assessment (0-12)	Overall repair assessment goebel (0-20)
femoral condyle (scaffold-only)	10.5	19
femoral condyle (scaffold-only)	11.5	19.5
femoral condyle (scaffold-only)	10.5	19
femoral condyle (scaffold-only)	10.5	18
femoral condyle (scaffold-only)	10.5	19
femoral condyle (scaffold-only)	10	18
femoral condyle (scaffold-only)	11.5	19
femoral condyle (scaffold-only)	11	19
femoral condyle (scaffold-only)	10.5	19
femoral condyle (scaffold-only)	11.5	19
femoral condyle (BMP-2)	11	19.5
femoral condyle (BMP-2)	10	18.5
femoral condyle (BMP-2)	12	19.5
femoral condyle (BMP-2)	9.5	18.5
femoral condyle (BMP-2)	10.5	19
femoral condyle (BMP-2)	5.5	13.5
femoral condyle (BMP-2)	11	19.5
femoral condyle (BMP-2)	11	19.5
femoral condyle (BMP-2)	10.5	18.5
femoral condyle (BMP-2)	11.5	19
Trochlear groove (scaffold-only)	11	19
Trochlear groove (scaffold-only)	12	20
Trochlear groove (scaffold-only)	11.5	19
Trochlear groove (scaffold-only)	11.5	19.5
Trochlear groove (scaffold-only)	11	19
Trochlear groove (scaffold-only)	11	18.5
Trochlear groove (scaffold-only)	10.5	18.5
Trochlear groove (scaffold-only)	11.5	19
Trochlear groove (scaffold-only)	11	17.5
Trochlear groove (scaffold-only)	12	19.5
Trochlear groove (BMP-2)	11.5	20
Trochlear groove (BMP-2)	12	19.5
Trochlear groove (BMP-2)	12	19.5
Trochlear groove (BMP-2)	12	19.5
Trochlear groove (BMP-2)	11.5	19
Trochlear groove (BMP-2)	10.5	18.5
Trochlear groove (BMP-2)	10.5	19
Trochlear groove (BMP-2)	11.5	19.5
Trochlear groove (BMP-2)	12	19.5
Trochlear groove (BMP-2)	12	18.5
histological quantification
goat tag	location	slides no.	group	OCD area	CD area	CD-empty	CD-fibrocartilage	CD-bone	CD-cartilage	CD-cartilage %	CD-fibrocartilage%	CD-bone%	BD (bone defect) area	BD-cartilage	BD-fibris	BD-empty	BD-bone	BD-fibris %	BD-cartilage %	BD-bone %	BD-osteochondral	BD-osteochondral %	bone/osteochondral tissue in BD	OCD-cartilage	OCD-bone	OCD-osteochondral	OCD-osteochondral%	OCD-cartilage %	OCD-bone %	bone/osteochondral tissue in OCD
080B	LTG	2021-0662	scaffold only	24.8603	3.07441	0.252235	2.13048	0.157546	0.534142	0.152702	0.719502	0.0481599	21.7859	0	0.255638	0	21.5303	0.0118327	0	0.988167	21.5303	0.988167	1	0.534142	21.6878	22.222	0.892676	0.019902	0.872774	0.978003
096F	LTG	2021-0666	scaffold only	29.4179	2.71787	1.41109	0.739059	0.091878	0.475842	0.173258	0.271748	0.0340625	26.7001	0.0649255	5.24444	0	21.3907	0.199356	0.00217511	0.798469	21.4556	0.800644	0.997365	0.540767	21.4826	22.0233	0.745126	0.0176734	0.727452	0.97661
106H	LTG	2021-0670	scaffold only	28.7583	3.28153	0.322053	2.16243	0.284089	0.512955	0.144371	0.670681	0.0833546	25.4768	0.317068	2.05846	0	23.1012	0.0829458	0.0126343	0.90442	23.4183	0.917054	0.986184	0.830023	23.3853	24.2153	0.839546	0.0280239	0.811522	0.966783
066C	RTG	2021-0676	scaffold only	25.4035	2.45195	0.681437	0.803248	0.353534	0.613731	0.24509	0.313979	0.133951	22.9515	0.118487	0.56546	0.029803	22.2378	0.0255922	0.00527842	0.967747	22.3562	0.973025	0.994539	0.732218	22.5913	23.3235	0.916956	0.0285506	0.888406	0.968923
077F	RTG	2021-0680	scaffold only	28.7955	2.3444	0.953197	0.985526	0.144308	0.261366	0.107703	0.418909	0.0617284	26.4511	0	2.7819	0	23.6692	0.10548	0	0.89452	23.6692	0.89452	1	0.261366	23.8135	24.0748	0.835747	0.00888726	0.82686	0.989394
086E	RTG	2021-0684	scaffold only	27.2175	3.00613	0.0325055	0.712356	0.326937	1.93433	0.651998	0.226887	0.110989	24.2114	0.527581	0	0	23.6838	0	0.0216917	0.978308	24.2114	1	0.978308	2.46191	24.0107	26.4726	0.9737	0.0910466	0.882653	0.906545
067E	LTG	2021-0686	scaffold only	28.5398	3.71711	0.0618765	1.84632	0.265713	1.54321	0.416717	0.495277	0.070001	24.8227	0	0	0	24.8227	0	0	1	24.8227	1	1	1.54321	25.0884	26.6317	0.932809	0.0546707	0.878139	0.941375
104D	RTG	2021-0692	scaffold only	21.0974	2.14312	0.0251385	0.067479	0.0141135	2.03639	0.953774	0.0288258	0.00610625	18.9542	3.18372	0.300748	0	15.4698	0.015816	0.168971	0.815213	18.6535	0.984184	0.828323	5.22011	15.4839	20.704	0.981637	0.248443	0.733194	0.746953
105F	LTG	2021-0694	scaffold only	25.3515	2.6365	0.680705	1.43844	0.0706965	0.446651	0.16789	0.54206	0.0260262	22.715	0	5.2597	0	17.4553	0.231603	0	0.768397	17.4553	0.768397	1	0.446651	17.526	17.9727	0.708818	0.0175594	0.691259	0.975306
110F	LTG	2021-0698	scaffold only	26.2851	2.45764	0.0499765	1.55574	0.294136	0.557783	0.228134	0.634046	0.116626	23.8275	0	2.45218	0	21.3753	0.104787	0	0.895213	21.3753	0.895213	1	0.557783	21.6694	22.2272	0.84385	0.0212687	0.822582	0.974777
080B	RTG	2021-0664	+BMP-2	25.4936	2.67468	0.114486	1.60253	0.126952	0.830708	0.30333	0.604796	0.0468304	22.819	0.354417	1.94368	0	20.5209	0.087607	0.0168143	0.895579	20.8753	0.912393	0.981425	1.18513	20.6478	21.8329	0.853171	0.0468527	0.806319	0.944991
096F	RTG	2021-0668	+BMP-2	30.1222	3.31483	1.75797	0.763373	0.227553	0.565929	0.161371	0.216844	0.061423	26.8074	0	0.676881	0.29572	25.8348	0.0275612	0	0.959621	25.8348	0.959621	1	0.565929	26.0624	26.6283	0.879217	0.0178746	0.861343	0.979915
106H	RTG	2021-0672	+BMP-2	30.2084	2.95873	0.026783	2.14454	0.038968	0.748435	0.254554	0.722035	0.0143674	27.2497	0	0.430303	0	26.8194	0.0162655	0	0.983734	26.8194	0.983734	1	0.748435	26.8583	27.6068	0.913606	0.0250647	0.888541	0.972557
066C	LTG	2021-0674	+BMP-2	29.2616	2.8223	0.111221	1.84342	0.173899	0.69376	0.240002	0.658114	0.0632362	26.4393	0.273788	1.43615	0	24.7294	0.055068	0.0107221	0.93421	25.0032	0.944932	0.988632	0.967548	24.9033	25.8708	0.882984	0.032823	0.850161	0.962847
077F	LTG	2021-0678	+BMP-2	30.5122	2.42135	1.01085	0.905505	0.141104	0.363896	0.149863	0.360521	0.0571885	28.0909	0.152247	3.76835	0.152377	24.0179	0.136438	0.00553361	0.852027	24.1701	0.857561	0.993491	0.516143	24.159	24.6751	0.805954	0.0169844	0.78897	0.978869
086E	LTG	2021-0682	+BMP-2	23.4509	2.4852	0.000944	1.57623	0.125924	0.782104	0.318451	0.631066	0.0500776	20.9657	0.580588	0.411428	0	19.9737	0.0195884	0.0279461	0.952465	20.5543	0.980412	0.971504	1.36269	20.0996	21.4623	0.915494	0.0585551	0.856938	0.93615
067E	RTG	2021-0688	+BMP-2	27.6295	3.21354	0.129713	1.93713	0.262959	0.883743	0.275302	0.600691	0.081129	24.4159	0.119045	1.4604	0	22.8365	0.0599435	0.00505195	0.935005	22.9555	0.940056	0.994604	1.00279	23.0995	24.1023	0.872237	0.0364595	0.835778	0.958184
104D	LTG	2021-0690	+BMP-2	24.0419	3.55553	0.03307	1.03497	0.111347	2.37614	0.666609	0.293762	0.0304782	20.4864	0.641054	0	0	19.8453	0	0.0320957	0.967904	20.4864	1	0.967904	3.01719	19.9567	22.9739	0.95412	0.126564	0.827556	0.867243
105F	RTG	2021-0696	+BMP-2	28.7283	3.62986	0.017559	0.644974	0.183493	2.78383	0.767103	0.17748	0.0505854	25.0984	2.20871	0	0	22.8897	0	0.0868645	0.913136	25.0984	1	0.913136	4.99254	23.0732	28.0657	0.977804	0.174173	0.803632	0.821915
110F	RTG	2021-0700	+BMP-2	26.1174	2.43279	0.0523095	1.18655	0.312273	0.881662	0.379224	0.478188	0.122107	23.6846	0.0087115	0	0	23.6759	0	0.000353387	0.999647	23.6846	1	0.999647	0.890373	23.9881	24.8785	0.953123	0.0346187	0.918504	0.963816
goat tag	location	slides no.	group	OCD area	CD area	CD-empty	CD-fibrocartilage	CD-bone	CD-cartilage	CD-cartilage %	CD-fibrocartilage%	CD-bone%	BD (bone defect) area	BD-cartilage	BD-fibris	BD-empty	BD-bone	BD-fibris %	BD-cartilage %	BD-bone %	BD-osteochondral	BD-osteochondral %	bone/osteochondral tissue in BD	OCD-cartilage	OCD-bone	OCD-osteochondral	OCD-osteochondral%	OCD-cartilage %	OCD-bone %	bone/osteochondral tissue in OCD
080B	LFC	2021-0707	scaffold only	30.7454	5.54645	2.28192	0.647972	0	2.61655	0.467469	0.118421	0	25.199	4.89908	0.124176	0	20.1757	0.00487475	0.195956	0.79917	25.0748	0.995125	0.803092	7.51564	20.1757	27.6913	0.899607	0.244807	0.6548	0.727785
096F	LFC	2021-0711	scaffold only	34.8839	4.52237	0.983831	0.287226	0	3.25131	0.72232	0.0627047	0	30.3615	0.37502	0	0	29.9865	0	0.0127687	0.987231	30.3615	1	0.987231	3.62633	29.9865	33.6128	0.962983	0.104081	0.858902	0.891849
106H	LFC	2021-0715	scaffold only	32.515	4.27034	0.872422	0.321171	0.066641	3.01011	0.703179	0.0768973	0.0160838	28.2447	7.96056	0.363366	0.0280185	19.8927	0.0125765	0.284331	0.70202	27.8533	0.986351	0.711825	10.9707	19.9594	30.93	0.950945	0.339019	0.611926	0.64337
066C	RFC	2021-0721	scaffold only	35.3516	5.42757	0.0353645	0.248935	0.141197	5.00207	0.922432	0.0456226	0.0252169	29.9241	0	1.16306	0	28.761	0.0388335	0	0.961167	28.761	0.961167	1	5.00207	28.9022	33.9043	0.95909	0.141724	0.817366	0.852235
077F	RFC	2021-0725	scaffold only	33.5035	5.84432	1.69123	0.644511	0.179724	3.32885	0.570644	0.109742	0.0300335	27.6592	7.91423	0	0	19.745	0	0.286334	0.713666	27.6592	1	0.713666	11.2431	19.9247	31.1678	0.930248	0.33562	0.594628	0.639176
086E	RFC	2021-0729	scaffold only	33.4903	7.2454	0.164236	0.104869	0.445201	6.5311	0.905639	0.0140386	0.0574906	26.2449	5.09397	0	0	21.1509	0	0.195232	0.804768	26.2449	1	0.804768	11.6251	21.5961	33.2212	0.991869	0.347939	0.64393	0.649179
067E	LFC	2021-0731	scaffold only	32.5823	6.28667	0.116858	0.064066	0.236011	5.86973	0.934516	0.0100443	0.0367363	26.2956	1.10117	0	0	25.1944	0	0.0419007	0.958099	26.2956	1	0.958099	6.9709	25.4304	32.4013	0.994418	0.214143	0.780275	0.784652
104D	RFC	2021-0737	scaffold only	26.5507	3.33145	0.251845	0.504995	0.175053	2.39956	0.744571	0.141999	0.038554	23.2192	0.146624	0	0	23.0726	0	0.00532219	0.994678	23.2192	1	0.994678	2.54618	23.2477	25.7938	0.973175	0.0940119	0.879163	0.903334
105F	LFC	2021-0739	scaffold only	30.8384	5.39694	0.379556	0.272165	0.0344895	4.71073	0.871214	0.0513001	0.00650089	25.4414	1.17527	0	0.0129745	24.2532	0	0.0472439	0.952157	25.4284	0.999401	0.952724	5.886	24.2877	30.1737	0.976075	0.19145	0.784625	0.803693
110F	LFC	2021-0743	scaffold only	31.1107	4.69329	0.183333	0.116138	0	4.39382	0.935264	0.0251947	0	26.4174	3.85153	1.01413	0	21.5518	0.0383784	0.148319	0.813303	25.4033	0.961622	0.845767	8.24535	21.5518	29.7971	0.957261	0.266812	0.690449	0.721037
080B	RFC	2021-0709	+BMP-2	30.6522	4.52158	0.718303	0.0315295	0.190166	3.58158	0.788026	0.00898979	0.0343514	26.1306	2.33682	1.91572	0.00203	21.8761	0.0727069	0.0901273	0.837094	24.2129	0.927222	0.90286	5.9184	22.0662	27.9846	0.913	0.192231	0.720769	0.789449
096F	RFC	2021-0713	+BMP-2	31.8041	3.66702	1.78032	0.063255	0.154109	1.66934	0.443175	0.0164992	0.0348658	28.1371	0.657264	7.72588	0.966576	18.7873	0.271678	0.0233723	0.670862	19.4446	0.694235	0.966263	2.32661	18.9415	21.2681	0.671045	0.07194	0.599106	0.892125
106H	RFC	2021-0717	+BMP-2	31.7174	3.24354	0.333473	0.198389	0.0303385	2.68134	0.82298	0.0673951	0.010577	28.4739	1.91753	0.867427	0	25.6889	0.0311755	0.0679595	0.900865	27.6065	0.968825	0.929797	4.59887	25.7193	30.3181	0.955044	0.145103	0.809941	0.848043
066C	LFC	2021-0719	+BMP-2	30.8853	5.75448	0.215111	0.142222	0.672247	4.7249	0.833183	0.0236388	0.106478	25.1308	1.56015	0.040657	0.00941	23.5206	0.00146926	0.0622313	0.935883	25.0807	0.998114	0.937653	6.28505	24.1928	30.4779	0.986532	0.203562	0.78297	0.79365
077F	LFC	2021-0723	+BMP-2	32.5091	8.10231	0.294827	0.408183	0.885774	6.51353	0.803676	0.050635	0.109218	24.4068	0.472861	0	0	23.9339	0	0.0193769	0.980623	24.4068	1	0.980623	6.98639	24.8197	31.8061	0.978351	0.214894	0.763457	0.780363
086E	LFC	2021-0727	+BMP-2	30.8739	7.0142	0.0549345	0.984735	0	5.97453	0.8521	0.140037	0	23.8597	4.97181	0.466849	0	18.4211	0.0196024	0.208821	0.771577	23.3929	0.980398	0.787	10.9463	18.4211	29.3674	0.951464	0.355504	0.59596	0.626448
067E	RFC	2021-0733	+BMP-2	30.5283	5.66198	0.12996	0.138547	0.0758125	5.31766	0.939524	0.0243446	0.0133118	24.8663	1.4705	2.0014	0	21.3944	0.0804838	0.0598151	0.859701	22.865	0.919516	0.93495	6.78816	21.4703	28.2584	0.925175	0.222808	0.702367	0.759087
104D	LFC	2021-0735	+BMP-2	28.656	4.39661	0.710441	0.168566	0	3.51761	0.80331	0.0369218	0	24.2594	2.8693	3.30467	0.018743	18.0667	0.136288	0.118279	0.744676	20.936	0.862955	0.862935	6.3869	18.0667	24.4536	0.853492	0.222934	0.630558	0.738801
105F	RFC	2021-0741	+BMP-2	31.7527	4.87443	1.02578	0.711228	0	3.13743	0.645438	0.144893	0	26.8782	4.26833	2.04871	0	20.5612	0.076408	0.159308	0.764284	24.8295	0.923592	0.827445	7.40576	20.5612	27.967	0.880305	0.233409	0.646896	0.734657
110F	RFC	2021-0745	+BMP-2	29.9217	5.0082	0.0752295	0	0.204331	4.72863	0.946985	0	0.0387489	24.9135	2.6023	0	0	22.3112	0	0.105739	0.894261	24.9135	1	0.894261	7.33094	22.5155	29.8465	0.997224	0.246941	0.750283	0.752313
CT quantification
goat	group	BV/TV	Tb.N	Tb.Th	Tb.Sp
066c_rfc	scaffold only	0.3696	1.2045	0.2936	0.8607
067e_lfc	scaffold only	0.3097	1.5879	0.1983	0.655
077f_rfc	scaffold only	0.4919	1.6296	0.3873	0.7226
080b_lfc	scaffold only	0.4033	1.559	0.2831	0.6501
086e_rfc	scaffold only	0.3595	1.5598	0.2625	0.6268
096f_lfc	scaffold only	0.6124	1.757	0.4573	0.5032
104d_rfc	scaffold only	0.2877	1.4001	0.2299	0.7118
105f_lfc	scaffold only	0.375	1.5131	0.2356	0.6885
106h_lfc	scaffold only	0.2868	1.2325	0.1983	0.9094
110f_lfc	scaffold only	0.5033	2.0426	0.2966	0.4497
066c_lfc	+BMP-2	0.4861	1.6566	0.4353	0.6427
067e_rfc	+BMP-2	0.3673	1.2524	0.2464	0.8916
077f_lfc	+BMP-2	0.3813	1.0968	0.3228	0.9924
080b_rfc	+BMP-2	0.3952	1.0634	0.3422	1.1446
086e_lfc	+BMP-2	0.206	0.5823	0.2096	1.8812
096f_rfc	+BMP-2	0.177	0.429	0.6096	2.6516
104d_lfc	+BMP-2	0.2338	0.8203	0.2331	1.3093
105f_rfc	+BMP-2	0.395	1.5778	0.2564	0.6506
106h_rfc	+BMP-2	0.333	1.4562	0.2669	0.7054
110f_rfc	+BMP-2	0.2783	0.8826	0.3355	1.2474
066c_rTG	scaffold only	0.2592	0.4868	0.3523	2.533
067e_lTG	scaffold only	0.383	1.5369	0.3639	0.6779
077f_rTG	scaffold only	0.2592	0.8651	0.3832	0.9746
080b_lTG	scaffold only	0.3907	0.8455	0.7178	1.3032
086e_rTG	scaffold only	0.2844	1.6809	0.2345	0.612
096f_lTG	scaffold only	0.3742	1.2273	0.2931	0.8881
104d_rTG	scaffold only	0.2357	1.0125	0.2305	1.1057
105f_lTG	scaffold only	0.1832	0.6415	0.3918	1.7916
106h_lTG	scaffold only	0.4517	1.4504	0.4504	0.7345
110f_lTG	scaffold only	0.3952	1.9847	0.2994	0.5077
066c_lTG	+BMP-2	0.4678	1.5427	0.5023	0.6114
067e_rTG	+BMP-2	0.2574	1.5736	0.3772	0.5902
077f_lTG	+BMP-2	0.2348	0.6076	0.3392	1.9623
080b_rTG	+BMP-2	0.3155	1.704	0.9117	0.238
086e_lTG	+BMP-2	0.3283	1.8682	0.2328	0.5468
096f_rTG	+BMP-2	0.3585	1.4956	0.3262	0.6958
104d_lTG	+BMP-2	0.279	1.3181	0.2614	0.8132
105f_rTG	+BMP-2	0.3497	1.4292	0.2438	0.7471
106h_rTG	+BMP-2	0.3345	1.244	0.2894	0.8415
110f_rTG	+BMP-2	0.2406	0.8914	0.2433	1.3384
TG: TGochlear groove
FC: femoral condyle
OCD osteochondral defect
CD: cartilage defect
